# Supplementary material
Source: PubMed Central journal article supplement (PMC8218531)
Supplement: mmc1.pdf [file mmc1.pdf]

**Structure, Volume 29**

**Supplemental Information**

**Structure-guided design of a perampanel-derived  
pharmacophore targeting the SARS-CoV-2 main protease**

**Maya G. Deshmukh, Joseph A. Ippolito, Chun-Hui Zhang, Elizabeth A. Stone, Raquel A. Reilly, Scott J. Miller, William L. Jorgensen, and Karen S. Anderson**

## Structure-guided design of a perampanel-derived pharmacophore targeting the SARS-CoV-2 main protease

Maya G. Deshmukh<sup>1,2</sup>, Joseph A. Ippolito<sup>3</sup>, Chun-Hui Zhang<sup>3</sup>, Elizabeth A. Stone<sup>3</sup>, Raquel A. Reilly<sup>2</sup>, Scott J. Miller<sup>3</sup>, William L. Jorgensen<sup>3</sup>, and Karen S. Anderson<sup>2,4</sup>

<sup>1</sup>Medical Scientist Training Program (MD-PhD), Yale School of Medicine, New Haven, CT, USA.

<sup>2</sup>Department of Pharmacology, Yale University School of Medicine, New Haven, CT 06520-8066.

<sup>3</sup>Department of Chemistry, Yale University, New Haven, Connecticut 06520-8107, USA. <sup>4</sup>Department of Molecular Biophysics and Biochemistry, Yale University School of Medicine, New Haven, CT 06520-8066.

### Supplementary Information

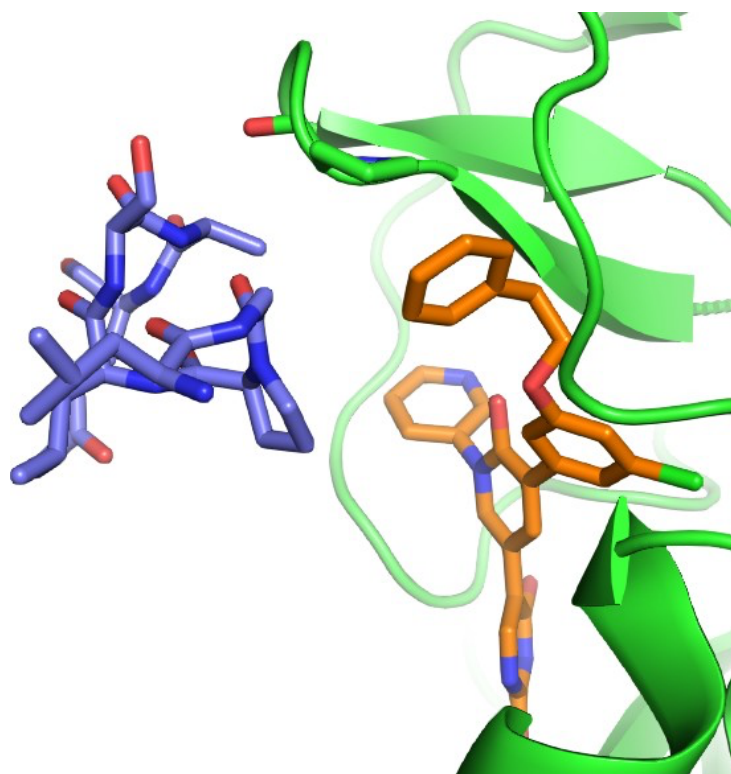

**Figure S1. Crystal structure of the complex of M<sup>pro</sup> with compound 15.** M<sup>pro</sup>:15 is shown with M<sup>pro</sup> in green, 15 in orange, and Leu<sup>250</sup>-Gln<sup>256</sup> of a symmetry-related molecule that packs in close proximity to Pro<sup>168</sup> shown in blue. Related to Figure 4.

| Complex                     | Mpro: Mpro-6             | Mpro: Mpro-11             | Mpro: Mpro-29             | Mpro: Mpro-15            | Mpro: Mpro-16            | Mpro: Mpro-19            | Mpro: Mpro-50            | Mpro: Mpro-25            | Mpro: Mpro-23            |
|-----------------------------|--------------------------|---------------------------|---------------------------|--------------------------|--------------------------|--------------------------|--------------------------|--------------------------|--------------------------|
| PDB ID                      | 7M8X                     | 7M8M                      | 7M8Z                      | 7M8Y                     | 7M8N                     | 7M8O                     | 7M90                     | 7M91                     | 7M8P                     |
| <b>Data collection</b>      |                          |                           |                           |                          |                          |                          |                          |                          |                          |
| X-Ray Source                | APS 24ID-E               | APS 24ID-E                | APS 24ID-E                | APS 24ID-E               | NSLS-II17-ID-1           | NSLS-II17-ID-1           | NSLS-II17-ID-1           | APS 24ID-E               | APS 24ID-E               |
| Wavelength, Å               | 0.97918                  | 0.97918                   | 0.97918                   | 0.97918                  | 0.920106                 | 0.920106                 | 0.920106                 | 0.97918                  | 0.97918                  |
| Space Group                 | C2                       | P212121                   | C2                        | C2                       | P212121                  | P212121                  | C2                       | C2                       | P212121                  |
| Cell dimensions             |                          |                           |                           |                          |                          |                          |                          |                          |                          |
| a, b, c (Å)                 | 96.831, 81.325, 54.553   | 67.790, 100.292, 103.036  | 97.711, 81.57, 54.567     | 115.371, 53.545, 44.719  | 67.306, 100.947, 104.137 | 67.841, 101.922, 103.797 | 96.807, 82.660, 54.667   | 97.9, 81.1, 54.7         | 68.18, 100.61, 104.35    |
| $\alpha, \beta, \gamma$ (°) | 90, 116.827, 90          | 90, 90, 90                | 90, 116.678, 90           | 90, 103.198, 90          | 90, 90, 90               | 90, 90, 90               | 90, 117.53, 90           | 90, 116.6, 90            | 90, 90, 90               |
| Resolution (Å)              | 48.652-1.751 (1.85-1.74) | 103.036-1.786 (1.88-1.78) | 48.758-1.8000 (1.90-1.79) | 56.162-1.761 (1.86-1.75) | 29.582-1.966 (2.07-1.96) | 29.503-2.449 (2.58-2.44) | 27.158-2.279 (2.40-2.27) | 48.781-1.961 (2.07-1.95) | 72.482-2.237 (2.36-2.23) |
| Rmerge                      | 0.074 (0.834)            | 0.077 (0.813)             | 0.092 (0.478)             | 0.069 (0.440)            | 0.136 (0.732)            | 0.170 (0.710)            | 0.063 (0.173)            | 0.14 (0.465)             | 0.064 (0.344)            |
| $I / \sigma I$              | 9.88 (1.41)              | 14.60 (2.52)              | 7.87 (1.93)               | 8.37 (1.98)              | 6.24 (1.35)              | 11.93 (3.19)             | 11.77 (4.83)             | 10.85 (4.34)             | 10.52 (2.82)             |
| Completeness (%)            | 94.7 (98.0)              | 99.6 (98.1)               | 97.1 (90.8)               | 96.7 (91.8)              | 98.3 (97.7)              | 99.5 (97.8)              | 97.1 (98.1)              | 96.9 (94.0)              | 97.9 (92.3)              |
| Redundancy                  | 3.440278<br>486          | 6.802257<br>804           | 3.374860<br>441           | 2.660227<br>318          | 3.074058<br>904          | 13.37499<br>545          | 3.046290<br>425          | 3.317307<br>692          | 3.117139<br>85           |
| <b>Refinement</b>           |                          |                           |                           |                          |                          |                          |                          |                          |                          |
| Resolution (Å)              | 48.65-1.74               | 71.87-1.78                | 48.76-1.79                | 56.16-1.75               | 29.50-1.96               | 29.50-2.44               | 27.15-2.19               | 48.78-1.95               | 72.43-2.23               |
| No. reflections             | 38,050                   | 68,032                    | 35,331                    | 26,375                   | 51,467                   | 27,418                   | 19,273                   | 52,859                   | 66,457                   |
| Rwork / Rfree               | 0.229/0.273              | 0.206/0.234               | 0.198/0.240               | 0.195/0.228              | 0.197/0.229              | 0.211/0.288              | 0.216/0.273              | 0.198/0.233              | 0.185/0.231              |
| No. atoms                   |                          |                           |                           |                          |                          |                          |                          |                          |                          |
| Protein                     | 2313                     | 4669                      | 2294                      | 2357                     | 4669                     | 4756                     | 2285                     | 2342                     | 4660                     |
| Inhibitor                   | 53                       | 51                        | 58                        | 58                       | 116                      | 55                       | 61                       | 51                       | 55                       |
| Water                       | 145                      | 296                       | 192                       | 242                      | 323                      | 191                      | 172                      | 163                      | 231                      |
| <b>B-factors</b>            |                          |                           |                           |                          |                          |                          |                          |                          |                          |
| Protein                     | 35.91                    | 31.24                     | 34.91                     | 29.91                    | 24.74                    | 45.19                    | 33.04                    | 26.86                    | 45.53                    |
| Inhibitor                   | 34.69                    | 33.07                     | 36.24                     | 34.08                    | 24.81                    | 44.14                    | 31.3                     | 28.45                    | 49.67                    |

|                  |       |       |       |       |       |       |       |       |       |
|------------------|-------|-------|-------|-------|-------|-------|-------|-------|-------|
| Water            | 40.91 | 37.04 | 41.01 | 38.08 | 31.39 | 44.21 | 34.54 | 30.93 | 52.19 |
| R.m.s deviations |       |       |       |       |       |       |       |       |       |
| Bond lengths (Å) | 0.007 | 0.006 | 0.007 | 0.007 | 0.007 | 0.007 | 0.009 | 0.007 | 0.007 |
| Bond angles(°)   | 0.82  | 0.89  | 0.84  | 0.88  | 0.88  | 0.94  | 0.93  | 0.84  | 0.87  |
| Ramach andran    |       |       |       |       |       |       |       |       |       |
| Favored (%)      | 97.99 | 97    | 98.63 | 98.67 | 97.17 | 92.48 | 95.41 | 97.32 | 97.01 |
| Allowed (%)      | 2.01  | 2.83  | 1.37  | 1     | 2.33  | 7.17  | 4.24  | 2.68  | 2.82  |
| Outliers (%)     | 0.00  | 0.17  | 0     | 0.33  | 0.5   | 0.35  | 0.35  | 0     | 0.17  |

**Table S1. Diffraction data and refinement statistics.** Related to Figures 4, 5, and STAR Methods.

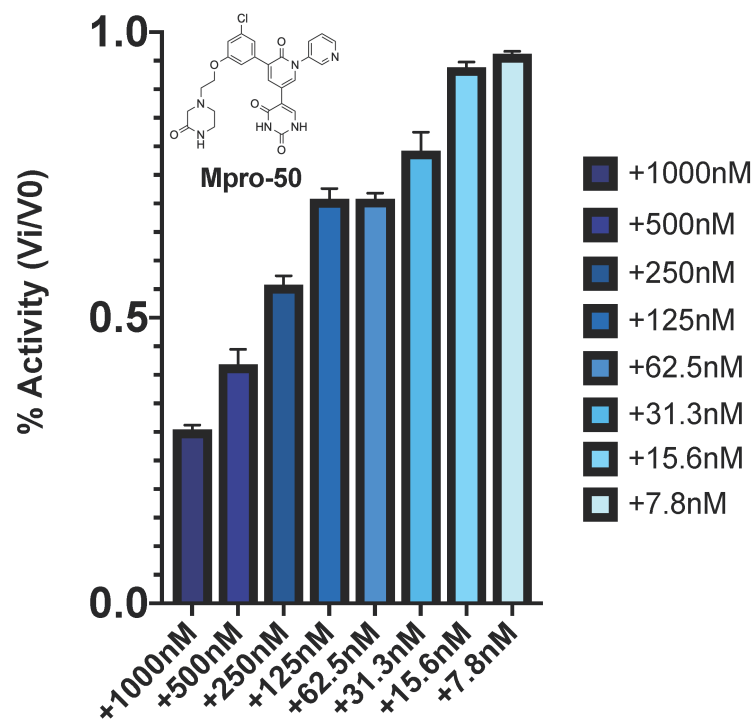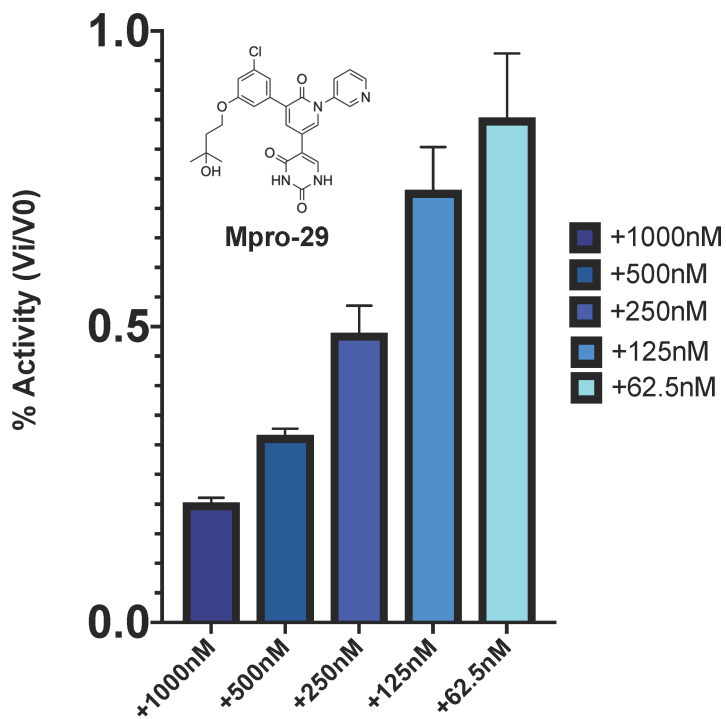

Figure S2. %Activity (Vi/V0) of M<sup>pro</sup> with compounds 50 (top) and 29 (bottom). Related to Table 1.

## NMR spectral data for synthesis of compounds 29 and 50

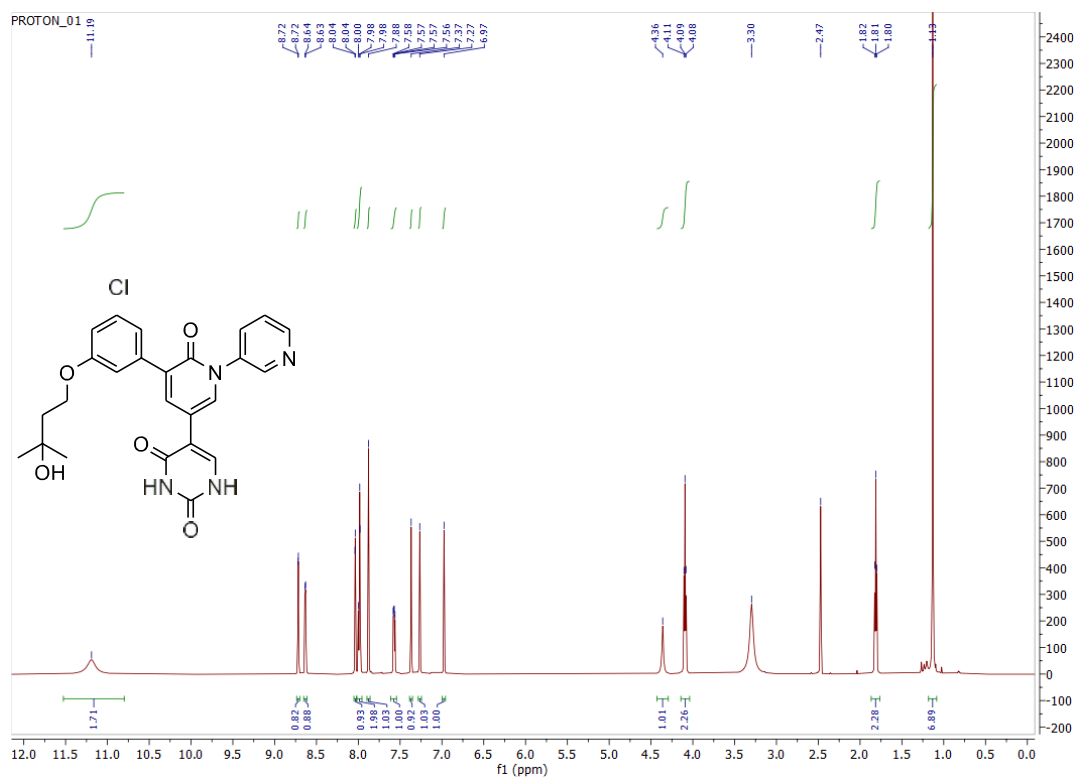

Figure S3. 29,  $^1\text{H}$  NMR (600 MHz,  $\text{DMSO-}d_6$ ). Related to STAR Methods.



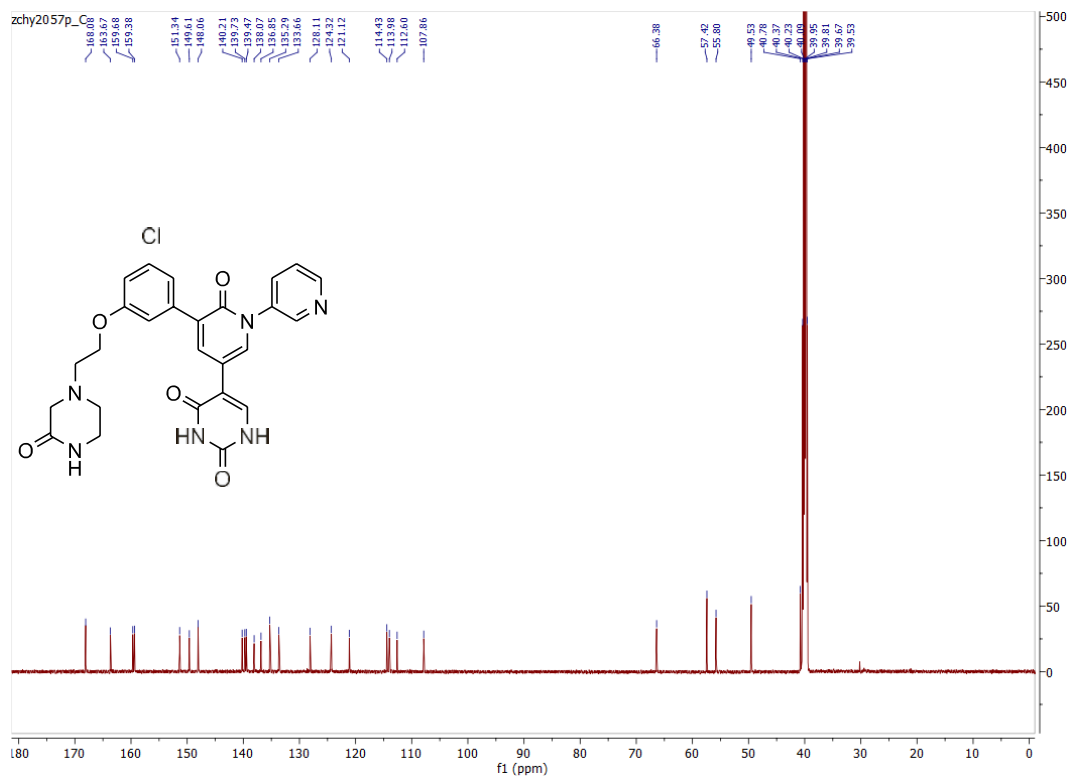

Figure S6. 50,  $^{13}\text{C}$  NMR (151 MHz,  $\text{DMSO-}d_6$ ). Related to STAR Methods.
